1 **Exploration of natural red-shifted rhodopsins using a machine learning-based Bayesian**  
2 **experimental design**

3

4 Keiichi Inoue<sup>1,2,3,4,5,11,\*</sup>, Masayuki Karasuyama<sup>5,6,11</sup>, Ryoko Nakamura<sup>3</sup>, Masae Konno<sup>3</sup>, Daichi  
5 Yamada<sup>3</sup>, Kentaro Mannen<sup>1</sup>, Takashi Nagata<sup>1,5</sup>, Yu Inatsu<sup>2</sup>, Kei Yura<sup>7,8,9</sup>, Oded Béjà<sup>10</sup>, Hideki  
6 Kandori<sup>2,3,4</sup>, Ichiro Takeuchi<sup>2,4,6,\*</sup>

7

8 <sup>1</sup> The Institute for Solid State Physics, The University of Tokyo, 5-1-5 Kashiwanoha, Kashiwa,  
9 Chiba 277-8581, Japan

10 <sup>2</sup> RIKEN Center for Advanced Intelligence Project, Nihonbashi 1-chome, 1-4-1 Nihonbashi,  
11 Chuo-ku, Tokyo, 103-0027, Japan

12 <sup>3</sup> Department of Life Science and Applied Chemistry, Nagoya Institute of Technology, Showa-  
13 ku, Nagoya 466-8555, Japan

14 <sup>4</sup> OptoBioTechnology Research Center, Nagoya Institute of Technology, Showa-ku, Nagoya  
15 466-8555, Japan

16 <sup>5</sup> PRESTO, Japan Science and Technology Agency, 4-1-8 Honcho, Kawaguchi, Saitama 332-  
17 0012, Japan

18 <sup>6</sup> Department of Computer Science, Nagoya Institute of Technology, Gokiso, Showa-ku,  
19 Nagoya, Aichi, 466-8555, Japan

20 <sup>7</sup> Graduate School of Humanities and Sciences, Ochanomizu University, 2-1-1 Otsuka, Bunkyo,  
21 Tokyo 112-8610, Japan

22 <sup>8</sup> Center for Interdisciplinary AI and Data Science, Ochanomizu University, 2-1-1 Otsuka,  
23 Bunkyo, Tokyo 112-8610, Japan

24 <sup>9</sup> School of Advanced Science and Engineering, Waseda University, 513 Tsurumaki, Shinjuku,  
25 Tokyo 162-0041, Japan

26 <sup>10</sup> Faculty of Biology, Technion-Israel Institute of Technology, Haifa 32000, Israel

27 <sup>11</sup>These authors contributed equally to this work

28 Correspondence and requests for materials should be addressed to K.I. ([inoue@issp.u-](mailto:inoue@issp.u-tokyo.ac.jp)  
29 [tokyo.ac.jp](mailto:inoue@issp.u-tokyo.ac.jp)) and I.T. (e-mail: [takeuchi.ichiro@nitech.ac.jp](mailto:takeuchi.ichiro@nitech.ac.jp))

30

31 **Abstract**

32 Microbial rhodopsins are photoreceptive membrane proteins utilized as molecular tools in  
33 optogenetics. In this paper, a machine learning (ML)-based model was constructed to  
34 approximate the relationship between amino acid sequences and absorption wavelengths using  
35 ~800 rhodopsins with known absorption wavelengths. This ML-based model was specifically  
36 designed for screening rhodopsins that are red-shifted from representative rhodopsins in the  
37 same subfamily. Among 5,558 candidate rhodopsins suggested by a protein BLAST search of  
38 several protein databases, 40 were selected by the ML-based model. The wavelengths of these  
39 40 selected candidates were experimentally investigated, and 32 (80%) showed red-shift gains.  
40 In addition, four showed red-shift gains  $> 20$  nm, and two were found to have desirable ion-  
41 transporting properties, indicating that they were potentially useful in optogenetics. These  
42 findings suggest that an ML-based model can reduce the cost for exploring new functional  
43 proteins.

44

## 45 **Introduction**

46 Microbial rhodopsins are photoreceptive membrane proteins widely distributed in bacteria,  
47 archaea, unicellular eukaryotes, and giant viruses<sup>1</sup>. They consist of seven transmembrane (TM)  
48  $\alpha$  helices, with a retinal chromophore bound to a conserved lysine residue in the seventh helix  
49 (Fig. 1a). The first microbial rhodopsin, bacteriorhodopsin (BR), was discovered in the plasma  
50 membrane of the halophilic archaea *Halobacterium salinarum* (formerly called *H. halobium*)<sup>2</sup>.  
51 BR forms a purple-coloured patch in the plasma membrane called purple membrane, which  
52 outwardly transports  $H^+$  using sunlight energy<sup>3</sup>. After the discovery of BR, various types of  
53 microbial rhodopsins were reported from diverse microorganisms, and recent progress in  
54 genome sequencing techniques has uncovered several thousand microbial rhodopsin genes<sup>1,4-</sup>  
55 <sup>6</sup>. These microbial rhodopsins show various types of biological functions upon light absorption,  
56 leading to all-*trans*-to-13-*cis* retinal isomerization. Among these, ion transporters, including  
57 light-driven ion pumps and light-gated ion channels, are the most ubiquitous (Fig. 1b). Ion-  
58 transporting rhodopsins can transport several types of cations and anions, including  $H^+$ ,  $Na^+$ ,  
59  $K^+$ , halides ( $Cl^-$ ,  $Br^-$ ,  $I^-$ ),  $NO^-$ , and  $SO_4^{2-}$ <sup>1,7-9</sup>. The molecular mechanisms of ion-transporting  
60 rhodopsins have been detailed in numerous biophysical, structural, and theoretical studies<sup>1</sup>.

61 In recent years, many ion-transporting rhodopsins have been used as molecular tools in  
62 optogenetics to control the activity of animal neurons optically *in vivo* by heterologous  
63 expression<sup>10</sup>, and optogenetics has revealed various new insights regarding the neural network  
64 relevant to memory, movement, and emotional behaviour<sup>11-14</sup>. However, strong light scattering  
65 by biological tissues and the cellular toxicity of shorter wavelength light make precise optical  
66 control difficult. To circumvent this difficulty, new molecular optogenetics tools based on red-  
67 shifted rhodopsins that can be controlled by weak scattering and low toxicity longer-  
68 wavelength light are urgently needed. Therefore, many approaches to obtain red-shifted  
69 rhodopsins, including gene screening, amino acid mutation based on biophysical and structural

70 insights, and the introduction of retinal analogs, have been reported<sup>15–17</sup>. Recently, a new  
71 method using a chimeric rhodopsin vector and functional assay was reported to screen the  
72 absorption maximum wavelengths ( $\lambda_{\max}$ ) and proton transport activities of several microbial  
73 rhodopsins present in specific environments<sup>18</sup>. This method identified partial sequences of red-  
74 shifted yellow (560–570 nm)-absorbing proteorhodopsin (PR), the most abundant outward H<sup>+</sup>-  
75 pumping bacterial rhodopsin subfamily, from the marine environment. Although these works  
76 identified several red-shifted rhodopsins<sup>14,15,17,19</sup>, those showing ideally red-shifted absorption  
77 and high ion-transport activity sufficient for optical control *in vivo* have yet to be obtained.

78 As an alternative approach, we recently introduced a data-driven machine learning (ML)-  
79 based approach<sup>20</sup>. In the previous study, we demonstrated how accurately the absorption  
80 wavelength of rhodopsins could be predicted based on the amino acid types on each position  
81 of the seven TM helices<sup>20</sup>. We constructed a database containing 796 wild-type (WT)  
82 rhodopsins and their variants, the  $\lambda_{\max}$  of which had been reported in earlier studies. Then, we  
83 demonstrated the prediction performance of the ML-based prediction model using a data-  
84 splitting approach, i.e., the data set was randomly divided into a training set and a test set; the  
85 former was used to construct the prediction model, and the latter was used to estimate the  
86 prediction ability. The results of this “proof-of-concept” study suggested that the absorption  
87 wavelengths of an unknown family of rhodopsins could be predicted with an average error of  
88  $\pm 7.8$  nm, which is comparable to the mean absolute error of  $\lambda_{\max}$  estimated by the hybrid  
89 quantum mechanics/molecular mechanics (QM/MM)<sup>21</sup> method. Considering the  
90 computational cost of both approaches, the ML-based approach is much more efficient than  
91 QM/MM approach, while the latter provides insights on the physical origin controlling  $\lambda_{\max}$ .

92 Encouraged by this result, in this study, we used an ML-based approach to screen more red-  
93 shifted rhodopsins from among 3,064 new candidates collected from public databases (non-  
94 redundant and metagenomic rhodopsin genes from the National Center for Biotechnology

95 Information [NCBI] and *Tara* Oceans data sets) for which the absorption wavelengths have not  
96 been investigated. The goal of the present study was to identify rhodopsins with a  $\lambda_{\max}$  longer  
97 than the wavelengths of representative rhodopsins in each subfamily of microbial rhodopsins  
98 for which the  $\lambda_{\max}$  has already been reported (base wavelengths). Here, we call the red-shift  
99 change in the wavelength from the base wavelength the “red-shift gain”. We focus on the  
100 problem of identifying rhodopsins with large red-shift gains because this would lead to the  
101 identification of amino acid types and residue positions that play important roles in red-shifting  
102 absorption wavelengths. In addition, in optogenetics applications, it is practically important to  
103 have a wide variety of ion-pumping rhodopsins from each subfamily to construct a new basis  
104 for rhodopsin toolboxes with red-shifted absorption and various types of ion species that can  
105 be transported. To screen rhodopsins that would have large red-shift gains, it is necessary to  
106 consider the uncertainty of prediction in the form of “predictive distributions”<sup>22</sup>. By using  
107 predictive distributions, it is possible to consider appropriately the “exploration–exploitation  
108 trade-off” in screening processes<sup>23,24</sup>, where exploration indicates an approach that prefers  
109 candidates with larger predictive variances, and exploitation indicates an approach that prefers  
110 candidates with longer predictive mean wavelengths (Fig. 2). In this paper, we employ a  
111 Bayesian modeling framework to compute the predictive distributions of candidate rhodopsin  
112 red-shift gains. We then consider an exploration–exploitation trade-off by selecting candidate  
113 rhodopsins based on a criterion called “expected red-shift gains”.

114 In this paper, we updated the ML-based model used in our previous study<sup>20</sup> so that it could  
115 properly compute expected red-shift gains and applied this new model to 3,064 ion-pumping  
116 rhodopsin candidates derived from archaeal and bacterial origins that can be easily expressed  
117 in *Escherichia coli* (Fig. 1b). We then selected 66 candidates for which the expected gains were  
118  $> 10$  nm, and experimentally investigated their wavelengths by introducing the synthesized  
119 rhodopsin genes into *E. coli*. Of these 66 selected candidates, 40 showed significant colouring

120 in *E. coli* cells, 32 showed actual red-shift gains, seven showed blue-shifts, and one showed no  
121 change, suggesting that our ML-based model enables more efficient screening of red-shifted  
122 rhodopsin genes compared with random choice (i.e., 80.5% [32/40] of the selected candidates  
123 showed red-shift gains with  $p < 10^{-3}$  in a binomial test). We then investigated the ion-  
124 transportation properties of the rhodopsins whose red-shift gains were  $> 20$  nm, and found that  
125 some actually had desired ion-transporting properties, suggesting that they (and their variants)  
126 could potentially be used as new optogenetics tools. Furthermore, the differences in the amino-  
127 acid sequences of the newly examined rhodopsins and the representative ones in the same  
128 subfamily could be used for further investigation of the red-shifting mechanisms.

129

## 130 **Results**

### 131 **Construction of an ML-based model for computing expected red-shift gain**

132 To compute the expected red-shift gains of a wide variety of rhodopsins, we updated various  
133 aspects of the ML model used in our previous study<sup>19</sup>. Figure 3 shows a schematic of the  
134 updating procedure. First, we added 97 WT microbial rhodopsins and their variants for which  
135 the  $\lambda_{\max}$  had recently been reported in the literature or determined by our experiments, to a  
136 previously reported data set<sup>20</sup>. In other words, the new training data set consisted of the amino  
137 acid sequences and  $\lambda_{\max}$  of 893 WT microbial rhodopsins and their variants (Extended Data  
138 Table 1). Second, the new ML model used only  $N = 24$  residues located around the retinal  
139 chromophore (Extended Data Figure 1) because our previous study<sup>19</sup> indicated that amino acid  
140 residues at these 24 positions play significant roles in predicting absorption wavelengths (Fig.  
141 3a). Third,  $M = 1818$  amino acid physicochemical features (Extended Data Table 2) were  
142 used as inputs in the ML model, as opposed to the amino acid types used in the previous ML  
143 model. This enabled us to predict the absorption wavelengths of a wide range of target  
144 rhodopsins that contain unexplored amino acid types in the training data at certain positions.

145 Therefore, an amino acid sequence is transformed into an  $M \times N = 432$  dimensional feature  
146 vector  $\mathbf{x} \in \mathbb{R}^{MN}$  by concatenating  $x_{i,j}$ , the  $j$ -th feature of the  $i$ -th residue (Fig. 3b). We  
147 consider a linear prediction model  $f(\mathbf{x}) = \mu + \sum_{i=1}^N \sum_{j=1}^M \beta_{i,j} x_{i,j}$ , where  $\beta_{i,j}$  is the  
148 parameter for the  $j$ -th feature of the  $i$ -th residue, and  $\mu$  is the intercept term.

149 Finally, to consider the exploration–exploitation trade-off appropriately in the screening  
150 process, we introduce a Bayesian modeling framework, which allows us to compute the  
151 predictive distributions of red-shift gains. Specifically, we employed Bayesian sparse modeling  
152 called BLASSO<sup>25</sup> (see the Methods section for details). This enables us to provide not only the  
153 mean, but also the variance of the predicted wavelengths. Unlike classical regression analysis,  
154 BLASSO regards the model parameters  $\beta_{i,j}$  and  $\mu$  as random variables generated from  
155 underlying distributions, as illustrated in Figure 3c. Therefore, the wavelength prediction  $f(\mathbf{x})$   
156 is also represented as a distribution. The red-shift gain is defined as  $\text{gain} = \max(f(\mathbf{x}) -$   
157  $\lambda_{\text{base}}, 0)$ , where  $\lambda_{\text{base}}$  is the wavelength of the representative rhodopsin in the same subfamily  
158 whose  $\lambda_{\text{max}}$  has been experimentally determined and reported in the literature (Extended Data  
159 Table 3). Note that the red-shift gain is positive if  $f(\mathbf{x})$  is greater than  $\lambda_{\text{base}}$ ; otherwise, it  
160 takes the value of zero. Since  $f(\mathbf{x})$  is regarded as a random variable in BLASSO, the red-shift  
161 gain is also regarded as a random variable. Therefore, we employ the expected value of the red-  
162 shift gain, denoted by  $\mathbb{E}[\text{gain}]$ , as the screening criterion where  $\mathbb{E}$  represents the expectation  
163 of a random variable. Illustrative examples of  $\mathbb{E}[\text{gain}]$  are shown in Figure 3d. Unlike the  
164 simple expectation of the wavelength prediction  $\mathbb{E}[f(\mathbf{x})]$ ,  $\mathbb{E}[\text{gain}]$  depends on the variance  
165 of the predictive distribution. This encourages the exploration of rhodopsin candidates having  
166 large uncertainty (for exploration), as opposed to only those having longer wavelengths with  
167 high confidence (for exploitation).

168

169 **Screening potential red-shifted microbial rhodopsins based on expected red-shift gains**



170 The target data set to explore red-shifted microbial rhodopsins was constructed by collecting  
171 putative microbial rhodopsin genes collected by a protein BLAST (blastp) search<sup>26</sup> of the NCBI  
172 non-redundant protein and metagenome databases<sup>27</sup>, as well as the *Tara* Oceans microbiome  
173 and virome databases<sup>28</sup>. As a result, we obtained a non-redundant data set of 5,558 microbial  
174 rhodopsin genes (Fig. 1b). The sequences were aligned by ClustalW and categorized to  
175 subfamilies of microbial rhodopsins based on the phylogenic distances, as reported  
176 previously<sup>29</sup>. Among these, 3,064 rhodopsin genes from bacterial and archaeal origins were  
177 extracted because their  $\lambda_{\max}$  can be easily measured by expressing in *E. coli* cells. We calculated  
178 the  $\mathbb{E}[\text{gain}]$  of these 3,064 genes (Extended Data Table 4), and then selected 66 genes of  
179 putative light-driven ion pump rhodopsins showing an  $\mathbb{E}[\text{gain}] > 10$  nm for further  
180 experimental evaluation, as ion pump rhodopsins can be used as new optogenetics tools.

181

### 182 **Experimental measurement of the absorption wavelengths of microbial rhodopsins** 183 **showing high red-shift gains**

184 We synthesized the selected 66 genes that showed an  $\mathbb{E}[\text{gain}] > 10$  nm. These were then  
185 introduced into *E. coli* cells, and the proteins expressed in the presence of 10  $\mu\text{M}$  all-*trans*  
186 retinal. As a result, 40 *E. coli* cells showed significant colouring, indicating significant  
187 expression of folded protein, and their  $\lambda_{\max}$  were determined by observing ultraviolet (UV)-  
188 visible absorption changes upon bleaching of the expressed rhodopsins through a hydrolysis  
189 reaction of their retinal with hydroxylamine, as previously reported<sup>20</sup> (Fig. 4). The observed  
190 gains were compared with the  $\mathbb{E}[\text{gain}]$  shown in Table 1. A full list of unexpressed genes is  
191 shown in Extended Data Table 5. In total, 32 of 40 genes showed a longer wavelength than  
192 their base wavelength (that is, positive red-shift gain) (Fig. 5), suggesting that our ML-based  
193 model can significantly improve the efficiency of screening to explore new red-shifted  
194 microbial rhodopsins compared with random sampling ( $p < 0.0002$ ).

195

## 196 **Ion-transport function of red-shifted microbial rhodopsins**

197 Overall, four of the 40 rhodopsins showed red-shifted absorption > 20 nm compared with the  
198 base wavelengths (Table 1): three were halorhodopsins (HRs) from bacterial species<sup>9,30,31</sup> (to  
199 distinguish classical HRs from archaeal species, these are hereafter referred to as bacterial-  
200 halorhodopsins [BacHRs]), and one was a PR<sup>32</sup>. Their ion-transport activities were then  
201 investigated by expressing in *E. coli* cells and observing the pH change in external solvent (Fig.  
202 6). Upon light illumination, BacHRs from *Rubrivirga marina* and *Myxosarcina* sp. G11 showed  
203 significant alkalization of external solvent, which was enhanced by addition of the  
204 protonophore (CCCP), which increases the H<sup>+</sup> permeability of the cell membrane, and the light-  
205 dependent alkalizations disappeared when anions were exchanged from Cl<sup>-</sup> to SO<sub>4</sub><sup>2-</sup>, indicating  
206 that these were light-driven Cl<sup>-</sup> pumps, similar to other rhodopsins in the same BacHR  
207 subfamily<sup>9,30</sup>. By contrast, *Cyanothece* sp. PCC 7425 did not show any significant transport.  
208 While no transporting function can be attributed to the heterologous expression in *E. coli*, it  
209 would have considerably different molecular properties from other BacHRs. PRs from a  
210 metagenome sequence (ECV93033.1) showed acidification of external solvent that was  
211 abolished by the addition of CCCP and was independent from ionic species in the solvent.  
212 Hence, this was a new red-shifted outward H<sup>+</sup> pump compared with typical PRs whose  $\lambda_{\max}$   
213 are present at ca. 520 nm<sup>32</sup>. These light-driven ion-pumping rhodopsins with red-shifted  $\lambda_{\max}$   
214 have the potential to be applied as new optogenetics tools, and thus, warrant further study in  
215 the near future.

216

## 217 **Discussion**

218 Microbial rhodopsins show a wide variety of  $\lambda_{\max}$  by changing steric and electrostatic  
219 interactions between all-*trans* retinal chromophores and surrounding amino acid residues. An

220 understanding of the colour-tuning rule enables more efficient screening and the design of new  
221 red-shifted rhodopsins that have value as optogenetics tools, and our ML-based data-driven  
222 approach therefore provides a new basis to identify colour-regulating factors without  
223 assumptions.

224 We previously demonstrated that an ML-based model based on ~800 experimental results  
225 could predict the  $\lambda_{\max}$  of microbial rhodopsins with an average error of  $\pm 7.8$  nm. Encouraged  
226 by this result, in the present study, we constructed a new ML-based model to compute expected  
227 red-shift gains for a wide range of unknown families of microbial rhodopsins. As a result, 33  
228 of 40 microbial rhodopsins were found to have red-shifted absorption compared with the base  
229 wavelengths of each subfamily of microbial rhodopsins (Table 1), suggesting that our data-  
230 driven ML approach can screen red-shifted microbial rhodopsin genes more efficiently than  
231 random choice.

232 By considering the exploration–exploitation trade-off, that is, to consider not only the  
233 expected value of the prediction, but also the uncertainty, it was possible to construct a red-  
234 shift protein screening process, as shown in Figure 7. Figure 7a shows the relationships  
235 between the prediction uncertainty (as measured by the standard deviation) and the observed  
236 red-shift gains. It can be seen that rhodopsins with red-shift gain are found in areas of not only  
237 low (small standard deviation), but also high prediction uncertainty (large standard deviation).  
238 Figure 7b shows the two-dimensional projection of the  $d = 432$  dimensional feature space by  
239 principal component analysis. It can be seen that red-shift gains (red) are found for target  
240 proteins not only close to training proteins (green), but also far from training proteins. Figure  
241 8 shows that the observed wavelengths and red-shift gains tend to be smaller than the predicted  
242 ones. We conjecture that these differences between the observed and predicted wavelengths  
243 and red-shift gains are due to modeling errors, possibly caused by a lack of sufficient  
244 information (e.g., three-dimensional structures) and modeling flexibility (e.g., nonlinear

245 effects); in other words, rhodopsins having high prediction values partly by modeling errors  
246 have a high chance of being selected. Therefore, it would be valuable to develop a statistical  
247 methodology to eliminate selection bias due to modeling errors.

248 Four rhodopsins showed red-shifted absorption > 20 nm than the base wavelength, three of  
249 which showed light-driven ion-transport function. Interestingly, while one BacHR from  
250 *Rubrivirga marina* (accession No.: WP 095512583.1) showed a 40-nm longer  $\lambda_{\max}$  (577 nm)  
251 than the base wavelength, another 11-nm red-shifted BacHR (WP 095509924.1) was also  
252 identified from the same bacteria (Table 1). These BacHRs are highly similar to each other  
253 (55.2% identity and 70.6% similarity), and only four of 24 amino acid residues around the  
254 retinal chromophore differ. Hence, *R. marina* evolved two BacHRs with 29-nm different  $\lambda_{\max}$   
255 by small amino acid replacement; the amino acid residue(s) responsible for this color-tuning  
256 should be investigated in the future.

257 The differences in amino acids in three of 24 retinal-surrounding residues are known to  
258 play a color-tuning role in natural rhodopsins without affecting their biological function. These  
259 correspond to positions 93, 186, and 215 in BR (BR Leu93, Pro186, and Ala215, respectively)<sup>16</sup>.  
260 Position 93 is known to be diversified in the PR family (the well-known position 105 in PRs).  
261 Green-light-absorbing PRs (GPRs) have leucine as a BR, whereas glutamine is conserved in  
262 blue-light-absorbing PRs<sup>4,18</sup>. This colour-tuning effect by the difference between leucine and  
263 glutamine is known as the “L/Q-switch”<sup>33</sup>. Interestingly, while 29.8% of 3,064 candidate genes  
264 have glutamine at this position, all 40 genes whose large red-shift gains were suggested by our  
265 ML-based model have amino acids other than glutamine, which suggests that our ML-based  
266 model avoided the genes having glutamine at position 93. Especially, 12 (37.5%) of 32 genes  
267 that actually showed red-shifted absorption compared with the base wavelengths had  
268 methionine at this position (Extended Data Figure 2), which is substantially higher than the  
269 proportion of methionine-conserving genes in the 3,064 candidates (16.1%). The red-shifting

270 effect of the L-to-M mutation of this residue in GPRs previously reported<sup>33</sup> and the current  
271 result imply that many rhodopsins have evolved methionine to absorb light with longer  
272 wavelengths. Position 215 in BR is also known to have a colour-tuning role. The mutation from  
273 alanine to threonine or serine (A/TS switch) has a blue-shifting effect of 9–20 nm<sup>16,34–36</sup>. Five  
274 of seven genes that showed blue-shifted  $\lambda_{\max}$  compared with the base wavelengths have  
275 threonine or serine at this position, suggesting that these types of genes should be avoided to  
276 explore red-shifted rhodopsins. By contrast, asparagine was conserved in more than half  
277 (58.4%) of the 3,064 candidate genes, especially in those belonging to the PR subfamily. A  
278 significant portion (37.5%) of the genes with red-shifted absorption compared with the base  
279 wavelengths also had asparagine at this position (Extended Data Figure 2). The A-to-N  
280 mutation at this position had a smaller effect (4–7 nm)<sup>20,35</sup> than that of the A-to-S/T mutation;  
281 thus, the difference between alanine and asparagine is not so critical to explore red-shifted  
282 rhodopsins. Position 186 in BR is proline in most microbial rhodopsins (in 98.7% of the 3,064  
283 candidate genes), and the mutation to non-proline amino acids induces red-shift of absorption<sup>16</sup>.  
284 We identified sodium pump rhodopsin (NaR) from *Parvularcula oceani*, which also has a  
285 threonine at this position, and showed 10-nm longer absorption than the base wavelength.  
286 Although genes having non-proline amino acids are rare in nature, it would be beneficial to  
287 identify new red-shifted rhodopsins. These results indicate that ML-based modelling can  
288 provide insights for identifying new functional tuning rules for proteins based on specific  
289 amino acid residues.

290 The number of reported microbial rhodopsin genes is rapidly increasing because of the  
291 development of next-generation sequencing techniques and microbe culturing methods. New  
292 microbial rhodopsins with molecular characteristics suitable for optogenetics applications are  
293 expected to be included in upcoming genomic data. Our ML-based model could be expected  
294 to reduce the costs associated with identifying red-shifted rhodopsins from these data.

295 Especially, we expect that our ML-based model could be applied to ion channel and enzymatic  
296 rhodopsins, which were not a focus of this study because of their eukaryotic origins; however,  
297 their use in optogenetics research could help identify more useful optogenetics tools with red-  
298 shifted absorption in the future.

299

## 300 **Methods**

### 301 **Construction of training and target data sets**

302 In this study, we constructed a new training data set (Extended Data Table 1) by adding 97  
303 genes for which the  $\lambda_{\max}$  had recently been reported in the literature or determined by our  
304 experiments, to a previously reported data set<sup>20</sup>. The sequences were aligned using ClustalW<sup>37</sup>  
305 and the results were manually checked to avoid improper gaps and/or shifts in the TM parts.  
306 The aligned sequences were then used for ML-based modeling.

307 To collect microbial rhodopsin genes for the training data set, BR<sup>38</sup> and heliorhodopsin  
308 48C12<sup>39</sup> sequences were used as queries for searching homologous amino acid sequences in  
309 NCBI non-redundant protein sequences and metagenomic proteins<sup>27</sup> and the *Tara* Oceans  
310 microbiome and virome database<sup>28</sup>. Protein BLAST (blastp)<sup>26</sup> was used for the homology  
311 search, with the threshold E-value set at < 10 by default, and sequences with > 180 amino acid  
312 residues were collected. All sequences were aligned using ClustalW<sup>37</sup>. The highly diversified  
313 C-terminal 15-residue region behind the retinal binding Lys (BR K216) and long loop of HeR  
314 between helices A and B were removed from the sequences to avoid unnecessary gaps in the  
315 alignment. The successful alignment of the TM helical regions, especially the 3rd and 7th  
316 helices, was checked manually. The phylogenetic tree was drawn using the neighbor-joining  
317 method<sup>40</sup>, and the microbial rhodopsin subfamilies were categorized based on the phylogenetic  
318 distances, as reported previously<sup>29</sup>. Based on the phylogenetic tree, 3,064 putative ion-pumping  
319 rhodopsin genes from bacterial and archaeal origins were extracted, and their aligned sequences

320 were used as the training data set for the prediction of  $\lambda_{\max}$ .

321

## 322 ML modeling

323 Suppose that we have  $K$  pairs of an amino acid sequence and an absorption wavelength

324  $\left\{ \left( \mathbf{x}^{(k)}, \lambda_{\max}^{(k)} \right) \right\}_{k=1}^K$ , where  $\mathbf{x}^{(k)} \in \mathbb{R}^{MN}$  is the feature vector of the  $k$ -th amino-acid sequence

325 and  $\lambda_{\max}^{(k)} \in \mathbb{R}$  is the absorption wavelength of the  $k$ -th rhodopsin protein. The least-absolute

326 shrinkage selection operator (LASSO) is a standard regression model in which important

327 regression coefficients can be automatically selected by the penalty on the absolute value of

328 the coefficient, as follows:

$$332 \min_{\mu, \boldsymbol{\beta}} \sum_{k=1}^K \left( \lambda_{\max}^{(k)} - \mu - \sum_{i=1}^M \sum_{j=1}^N \beta_{i,j} x_{i,j}^{(k)} \right)^2 + \gamma \sum_{i=1}^M \sum_{j=1}^N |\beta_{i,j}|,$$

329 where  $\boldsymbol{\beta} \in \mathbb{R}^{MN}$  is a vector of  $\beta_{i,j}$  and  $\gamma > 0$  is the regularization parameter. BLASSO is a

330 Bayesian extension of LASSO for which the model is defined through the following random

331 variables:

$$340 \lambda_{\max}^{(k)} \sim N(\mu + \boldsymbol{\beta}^T \mathbf{x}^{(k)}, \sigma^2),$$

$$341 \boldsymbol{\beta} \sim \pi(\boldsymbol{\beta} | \sigma^2),$$

333 where  $N(\mu, s^2)$  is a Gaussian distribution with mean  $\mu$  and variance  $s^2$ , and  $\pi(\boldsymbol{\beta} | \sigma^2) =$

334  $\prod_{i=1}^M \prod_{j=1}^N \frac{\gamma}{2\sqrt{\sigma^2}} e^{-\gamma|\beta_{i,j}|/\sqrt{\sigma^2}}$  is the conditional Laplace prior. In this model, the maximum of

335 the conditional distribution of the parameter  $\boldsymbol{\beta} | \left\{ \left( \mathbf{x}^{(k)}, \lambda_{\max}^{(k)} \right) \right\}_{k=1}^K, \lambda, \sigma$  is equivalent to the

336 LASSO<sup>41</sup> estimator. For the computational details, see the original paper<sup>25</sup>. Since the resulting

337 predictive distribution of  $f(\mathbf{x})$  is not analytically tractable, the parameters  $\boldsymbol{\beta}$  and  $\mu$  are

338 sampled from the estimated distribution  $T = 10,000$  times. For each candidate  $\mathbf{x}$ , we

339 approximately obtain  $\mathbb{E}[\text{gain}]$  by

343 
$$\mathbb{E}[\text{gain}] \approx \frac{1}{T} \sum_{t=1}^T \max(\mu^{(t)} + \boldsymbol{\beta}^{(t)\top} \mathbf{x} - \lambda_{\text{base}}, 0),$$

342 where  $\mu^{(t)}$  and  $\boldsymbol{\beta}^{(t)}$  are the  $t$ -th sampled parameters.

344

### 345 **Protein expression**

346 The synthesized genes of microbial rhodopsins codon-optimized for *E. coli* (Genscript, NJ)  
347 were incorporated into the multi-cloning site in the pET21a(+) vector (Novagen, Merck KGaA,  
348 Germany). The plasmids carrying the microbial rhodopsin genes were transformed into the *E.*  
349 *coli* C43(DE3) strain (Lucigen, WI). Protein expression was induced by 1 mM isopropyl  $\beta$ -D-  
350 1-thiogalactopyranoside (IPTG) in the presence of 10  $\mu$ M all-*trans* retinal for 4 h.

351

### 352 **Measurement of the absorption spectra and $\lambda_{\text{max}}$ of rhodopsins by bleaching with** 353 **hydroxylamine**

354 *E. coli* cells expressing rhodopsins were washed three times with a solution containing 100  
355 mM NaCl and 50 mM  $\text{Na}_2\text{HPO}_4$  (pH 7). The washed cells were treated with 1 mM lysozyme  
356 for 1 h and then disrupted by sonication for 5 min (VP-300N; TAITEC, Japan). To solubilize  
357 the rhodopsins, 3% *n*-dodecyl-D-maltoside (DDM, Anatrace, OH) was added and the samples  
358 were stirred for overnight at 4 °C. The rhodopsins were bleached with 500 mM hydroxylamine  
359 and subjected to yellow light illumination ( $\lambda > 500$  nm) from the output of a 1-kW  
360 tungsten-halogen projector lamp (Master HILUX-HR; Rikagaku) through coloured glass (Y-  
361 52; AGC Techno Glass, Japan) and heat-absorbing filters (HAF-50S-15H; SIGMA KOKI,  
362 Japan). The absorption change upon bleaching was measured by a UV-visible spectrometer (V-  
363 730; JASCO, Japan).

364

### 365 **Ion-transport assay of rhodopsins in *E. coli* cells**



366 To assay the ion-transport activity in *E. coli* cells, the cells carrying expressed rhodopsin were  
367 washed three times and resuspended in unbuffered 100 mM NaCl. A cell suspension of 7.5 mL  
368 at  $OD_{660} = 2$  was placed in the dark in a glass cell at 20 °C and illuminated at  $\lambda > 500$  nm from  
369 the output of a 1 kW tungsten–halogen projector lamp (Rikagaku, Japan) through a long-pass  
370 filter (Y-52; AGC Techno Glass, Japan) and a heat-absorbing filter (HAF-50S-50H; SIGMA  
371 KOKI, Japan). The light-induced pH changes were measured using a pH electrode (9618S-  
372 10D; HORIBA, Japan). All measurements were repeated under the same conditions after the  
373 addition of 10  $\mu$ M CCCP.

374

### 375 **Reporting Summary**

376 Further information on experimental design is available in the Nature Research Reporting  
377 Summary linked to this article.

378

### 379 **Data Availability**

380 Data supporting the findings of this manuscript are available from the corresponding author  
381 upon reasonable request.

382

## 383 **References**

- 384 1 Ernst, O. P. *et al.* Microbial and animal rhodopsins: Structures, functions, and molecular  
385 mechanisms. *Chem. Rev.* **114**, 126-163 (2014).
- 386 2 Oesterhelt, D. & Stoeckenius, W. Rhodopsin-like protein from the purple membrane of  
387 *Halobacterium halobium*. *Nat. New Biol.* **233**, 149-152 (1971).
- 388 3 Oesterhelt, D. & Stoeckenius, W. Functions of a new photoreceptor membrane. *Proc.*  
389 *Natl. Acad. Sci. USA* **70**, 2853-2857 (1973).
- 390 4 Man, D. *et al.* Diversification and spectral tuning in marine proteorhodopsins. *EMBO*  
391 *J.* **22**, 1725-1731 (2003).
- 392 5 Venter, J. C. *et al.* Environmental genome shotgun sequencing of the sargasso sea.  
393 *Science* **304**, 66-74 (2004).
- 394 6 Inoue, K., Kato, Y. & Kandori, H. Light-driven ion-translocating rhodopsins in marine  
395 bacteria. *Trends. Microbiol.* **23**, 91-98 (2014).
- 396 7 Inoue, K. *et al.* A light-driven sodium ion pump in marine bacteria. *Nat. Commun.* **4**,  
397 1678 (2013) 10.1038/ncomms2689.
- 398 8 Nagel, G. *et al.* Channelrhodopsin-1: A light-gated proton channel in green algae.  
399 *Science* **296**, 2395-2398 (2002).
- 400 9 Niho, A. *et al.* Demonstration of a light-driven  $\text{SO}_4^{2-}$  transporter and its spectroscopic  
401 characteristics. *J. Am. Chem. Soc.* (2017).
- 402 10 Deisseroth, K. Optogenetics: 10 years of microbial opsins in neuroscience. *Nat.*  
403 *Neurosci.* **18**, 1213-1225 (2015).
- 404 11 Liu, X. *et al.* Optogenetic stimulation of a hippocampal engram activates fear memory  
405 recall. *Nature* **484**, 381-385 (2012).
- 406 12 Ramirez, S. *et al.* Creating a false memory in the hippocampus. *Science* **341**, 387-391  
407 (2013).
- 408 13 Yizhar, O. *et al.* Neocortical excitation/inhibition balance in information processing and

- 409 social dysfunction. *Nature* **477**, 171-178 (2011).
- 410 14 Marshel, J. H. *et al.* Cortical layer-specific critical dynamics triggering perception.  
411 *Science* **365**, eaaw5202 (2019).
- 412 15 Schneider, F., Grimm, C. & Hegemann, P. Biophysics of channelrhodopsin. *Annu. Rev.*  
413 *Biophys.* **44**, 167-186 (2015).
- 414 16 Inoue, K. *et al.* Red-shifting mutation of light-driven sodium-pump rhodopsin. *Nat.*  
415 *Commun.* **10**, 1993 (2019).
- 416 17 Ganapathy, S. *et al.* Retinal-based proton pumping in the near infrared. *J. Am. Chem.*  
417 *Soc.* **139**, 2338-2344 (2017).
- 418 18 Pushkarev, A. *et al.* The use of a chimeric rhodopsin vector for the detection of new  
419 proteorhodopsins based on color. *Front. Microbiol.* **9**, 439 (2018).
- 420 19 Oda, K. *et al.* Crystal structure of the red light-activated channelrhodopsin Chrimson.  
421 *Nat. Commun.* **9**, 3949 (2018) 10.1038/s41467-018-06421-9.
- 422 20 Karasuyama, M., Inoue, K., Nakamura, R., Kandori, H. & Takeuchi, I. Understanding  
423 colour tuning rules and predicting absorption wavelengths of microbial rhodopsins by  
424 data-driven machine-learning approach. *Sci. Rep.* **8**, 15580 (2018).
- 425 21 Pedraza-González, L., De Vico, L., Marín, M. d. C., Fanelli, F. & Olivucci, M. A-arm:  
426 Automatic rhodopsin modeling with chromophore cavity generation, ionization state  
427 selection, and external counterion placement. *J. Chem. Theory Comput.* **15**, 3134-3152  
428 (2019).
- 429 22 Bishop, C. M. *Pattern recognition and machine learning.* (Springer, 2006).
- 430 23 Snoek, J., Larochelle, H. & Adams, R. P. in *Advances in Neural Information Processing*  
431 *Systems 25 (NIPS 2012)*. (eds F. Pereira, C. J. C. Burges, L. Bottou, & K. Q.  
432 Weinberger) 2951-2959 (Curran Associates, Inc.).
- 433 24 Shahriari, B., Swersky, K., Wang, Z., Adams, R. P. & Freitas, N. d. in *Proceedings of*  
434 *the IEEE.* 148-175.

- 435 25 Park, T. & Casella, G. The bayesian lasso. *J. Am. Stat. Assoc.* **103**, 681-686 (2008).
- 436 26 Johnson, M. *et al.* Ncbi blast: A better web interface. *Nucleic Acids Res.* **36**, W5-W9  
437 (2008).
- 438 27 Brown, G. R. *et al.* Gene: A gene-centered information resource at ncbi. *Nucleic Acids*  
439 *Res.* **43**, D36-D42 (2015).
- 440 28 Sunagawa, S. *et al.* Ocean plankton. Structure and function of the global ocean  
441 microbiome. *Science* **348**, 1261359 (2015).
- 442 29 Yamauchi, Y. *et al.* Engineered functional recovery of microbial rhodopsin without  
443 retinal-binding lysine. *Photochem Photobiol* **95**, 1116-1121 (2019).
- 444 30 Hasemi, T., Kikukawa, T., Kamo, N. & Demura, M. Characterization of a  
445 cyanobacterial chloride-pumping rhodopsin and its conversion into a proton pump. *J.*  
446 *Biol. Chem.* **291**, 355-362 (2016).
- 447 31 Harris, A. *et al.* Molecular details of the unique mechanism of chloride transport by a  
448 cyanobacterial rhodopsin. *Phys. Chem. Chem. Phys.* **20**, 3184-3199 (2018).
- 449 32 Bèjà, O. *et al.* Bacterial rhodopsin: Evidence for a new type of phototrophy in the sea.  
450 *Science* **289**, 1902-1906 (2000).
- 451 33 Ozaki, Y., Kawashima, T., Abe-Yoshizumi, R. & Kandori, H. A color-determining  
452 amino acid residue of proteorhodopsin. *Biochemistry* **53**, 6032-6040 (2014).
- 453 34 Shimono, K., Ikeura, Y., Sudo, Y., Iwamoto, M. & Kamo, N. Environment around the  
454 chromophore in *pharaonis* phoborhodopsin: Mutation analysis of the retinal binding  
455 site. *Biochim. Biophys. Acta* **1515**, 92-100 (2001).
- 456 35 Sudo, Y. *et al.* A blue-shifted light-driven proton pump for neural silencing. *J. Biol.*  
457 *Chem.* **288**, 20624-20632 (2013).
- 458 36 Inoue, K. *et al.* Converting a light-driven proton pump into a light-gated proton channel.  
459 *J. Am. Chem. Soc.* **137**, 3291-3299 (2015).
- 460 37 Thompson, J. D., Higgins, D. G. & Gibson, T. J. Clustal-W - improving the sensitivity

461 of progressive multiple sequence alignment through sequence weighting, position-  
462 specific gap penalties and weight matrix choice. *Nucleic Acids Res.* **22**, 4673-4680  
463 (1994).

464 38 Khorana, H. G. *et al.* Amino acid sequence of bacteriorhodopsin. *Proc. Natl. Acad. Sci.*  
465 *USA* **76**, 5046-5050 (1979).

466 39 Pushkarev, A. *et al.* A distinct abundant group of microbial rhodopsins discovered using  
467 functional metagenomics. *Nature* **558**, 595-599 (2018).

468 40 Saitou, N. & Nei, M. The neighbor-joining method: A new method for reconstructing  
469 phylogenetic trees. *Mol. Biol. Evol.* **4**, 406-425 (1987).

470 41 Tibshirani, R. Regression shrinkage and selection via the lasso. *Journal of the Royal*  
471 *Statistical Society. Series B (Methodological)* **58**, 267-288 (1996).

472

473 **Acknowledgments**

474 This work was supported by Grants-in-Aid from the Japan Society for the Promotion of Science  
475 (JSPS) for Scientific Research (KAKENHI grant Nos. 17H03007 to K.I., 17H04694 and  
476 16H06538 to M.Karasuyama, 19H04959 to H.K., and 17H00758 and 16H06538 to I.T.), the  
477 Japan Science and Technology Agency (JST), PRESTO, Japan (grant Nos. JPMJPR15P2 to  
478 K.I. and JPMJPR15N2 to M.Karasuyama), and CREST, Japan (grant No. JPMJCR1502) to  
479 I.T.; K.I., H.K., and I.T. received support from RIKEN AIP; O.B. received support from the  
480 Louis and Lyra Richmond Memorial Chair in Life Sciences.

481

482 **Author contributions**

483 K.I., R.G., O.B., and H.K. contributed to the study design; K.I., D.Y., K.Y., and O.B. collected  
484 sequences of non-redundant and metagenomic rhodopsin genes from the GenBank and *Tara*  
485 Oceans metagenomic data sets and conducted multiple amino-acid alignments of rhodopsins;  
486 M.Karasuyama, Y.I., and I.T. constructed the machine learning method to estimate the  
487 absorption wavelengths of microbial rhodopsins; R.N. constructed DNA plasmids of microbial  
488 rhodopsins and introduced them into *E. coli* cells; R.N., K.M., and T.N. conducted expressions  
489 of microbial rhodopsins in *E. coli* cells and determined their  $\lambda_{\max}$  by hydroxylamine bleaching;  
490 M.Konno carried out the ion-transport assay of rhodopsins in *E. coli* cells; K.I., M.Karasuyama.,  
491 H.K., and I.T. wrote the paper; All authors discussed and commented on the manuscript.

492

493 **Competing interests**

494 The authors declare no competing interests.

495

496 **Table**

497 **Table 1. Predicted and observed gains of 40 microbial rhodopsins expressed in *E. coli*.**

| Origin                                                   | Accession              | Subfamily | Motif | Base wavelength / nm | E [gain] | Observed wavelength / nm | (Observed wavelength) – (base wavelength) / nm |
|----------------------------------------------------------|------------------------|-----------|-------|----------------------|----------|--------------------------|------------------------------------------------|
| <i>Rubricoccus marinus</i>                               | WP 094550238.1         | BacHR     | TSA   | 537                  | 40.7     | 541                      | 4                                              |
| <i>Rubrivirga marina</i>                                 | WP 095509924.1         | BacHR     | TSA   | 537                  | 39.8     | 548                      | 11                                             |
| <i>Rubrivirga marina</i>                                 | WP 095512583.1         | BacHR     | TTD   | 537                  | 35.5     | 577                      | 40                                             |
| <i>Bacillus</i> sp. CHD6a                                | WP 082380780.1         | XeR       | DTA   | 565                  | 35.3     | 566                      | 1                                              |
| <i>Bacillus horikoshii</i>                               | WP 063559373.1         | XeR       | DTA   | 565                  | 35.3     | 565                      | 0                                              |
| <i>Cyanothece</i> sp. PCC 7425                           | WP 012628826.1         | BacHR     | TSV   | 537                  | 32.9     | 566                      | 29                                             |
| <i>Cyanobacterium</i> TDX16                              | OWY65757.1             | BacHR     | TSD   | 537                  | 32.9     | 546                      | 9                                              |
| <i>Myxosarcina</i> sp. GI1                               | WP 052056058.1         | BacHR     | TTV   | 537                  | 31.2     | 557                      | 20                                             |
| <i>Nanohaloarchaea</i> archaeon SW 7 43 1                | PSG98511.1             | XeR       | DSA   | 565                  | 29.2     | 572                      | 7                                              |
| Metagenome sequence                                      | SAMEA2621839 1737175 2 | CIR       | NTQ   | 530                  | 25.7     | 520                      | -10                                            |
| Metagenome sequence                                      | SAMEA2620666 5055 4    | CIR       | NTQ   | 530                  | 25.1     | 525                      | -5                                             |
| <i>Nonlabens</i> sp. YIK11                               | AIG86802.2             | PR        | DTE   | 520                  | 21.5     | 531                      | 11                                             |
| Metagenome sequence                                      | SAMEA2622673 750013 58 | CIR       | NTQ   | 530                  | 21.4     | 534                      | 4                                              |
| Metagenome sequence                                      | EBN24473.1             | PR        | DTE   | 520                  | 20.0     | 525                      | 5                                              |
| Metagenome sequence                                      | SAMEA2620404 88891 6   | PR        | DTE   | 520                  | 20.0     | 527                      | 7                                              |
| <i>Parvularcula oceani</i>                               | WP_051881578.1         | NaR       | NDQ   | 525                  | 19.7     | 534                      | 9                                              |
| <i>Rubrobacter aplysinae</i>                             | WP 084709429.1         | DTG       | DTG   | 535                  | 19.5     | 541                      | 6                                              |
| Metagenome sequence                                      | SAMEA2619531 1917517 3 | PR        | DTE   | 520                  | 18.0     | 537                      | 17                                             |
| Metagenome sequence                                      | SAMEA2622766 213679 12 | XeR       | DSA   | 565                  | 17.8     | 572                      | 7                                              |
| <i>Reinekea forsetii</i>                                 | WP 100255947.1         | PR        | DTE   | 520                  | 17.1     | 524                      | 4                                              |
| <i>Bacteroidetes</i> bacterium                           | PSR14004.1             | PR        | DTE   | 520                  | 15.4     | 537                      | 17                                             |
| Metagenome sequence                                      | SAMEA2620980 19116 14  | PR        | DTE   | 520                  | 15.4     | 536                      | 16                                             |
| <i>Hassallia byssoidea</i> VB512170                      | KIF37192.1             | BacHR     | TSD   | 537                  | 15.1     | 535                      | -2                                             |
| <i>Erythrobacter gangjinensis</i>                        | WP 047006274.1         | NaR       | NDQ   | 525                  | 13.7     | 531                      | 6                                              |
| <i>Pontimonas salivibrio</i>                             | WP 104913209.1         | PR        | DTE   | 520                  | 12.2     | 538                      | 18                                             |
| <i>Cyanobacteria</i> bacterium QH 1 48 107               | PSO50292.1             | CyanDTE   | DTD   | 545                  | 12.0     | 548                      | 3                                              |
| <i>Kineococcus radiotolerans</i>                         | WP 011981580.1         | ActR      | DTE   | 540                  | 11.2     | 536                      | -4                                             |
| <i>Sphingopyxis baekryungensis</i>                       | WP 022671827.1         | CIR       | NTQ   | 530                  | 11.0     | 518                      | -12                                            |
| <i>Sphingobacteriales</i> bacterium BACL12 MAG120802bin5 | KRP08428.1             | PR        | DTE   | 520                  | 10.9     | 531                      | 11                                             |
| Metagenome sequence                                      | SAMEA2621401 1198262 5 | PR        | DTE   | 520                  | 10.9     | 534                      | 14                                             |
| <i>Spirosoma oryzae</i>                                  | WP 106137740.1         | NaR       | NDQ   | 525                  | 10.8     | 533                      | 8                                              |
| <i>Aliterella atlantica</i>                              | WP 045053084.1         | BacHR     | TSD   | 537                  | 10.8     | 533                      | -4                                             |
| <i>Rosenbergiella nectarea</i>                           | WP 092678153.1         | DTG       | DTG   | 535                  | 10.8     | 533                      | -2                                             |
| Metagenome sequence                                      | SAMEA2620980 1827033 1 | PR        | DTE   | 520                  | 10.4     | 537                      | 17                                             |
| <i>Fluviicola</i> sp. XM24bin1                           | PWL28924.1             | PR        | DTE   | 520                  | 10.4     | 538                      | 18                                             |
| Metagenome sequence                                      | SAMEA2622173 654706 7  | PR        | DTE   | 520                  | 10.4     | 530                      | 10                                             |
| Metagenome sequence                                      | SAMEA2619399 1397592 7 | PR        | DTE   | 520                  | 10.4     | 529                      | 9                                              |
| <i>Sphingomonas</i> sp. Leaf34                           | WP 055875688.1         | DTG       | DTG   | 535                  | 10.3     | 540                      | 5                                              |
| <i>Sphingomonas</i> sp. Leaf38                           | WP 056475157.1         | DTG       | DTG   | 535                  | 10.3     | 540                      | 5                                              |
| Metagenome sequence                                      | ECV93033.1             | PR        | DTE   | 520                  | 10.3     | 542                      | 22                                             |



498 **Figures**

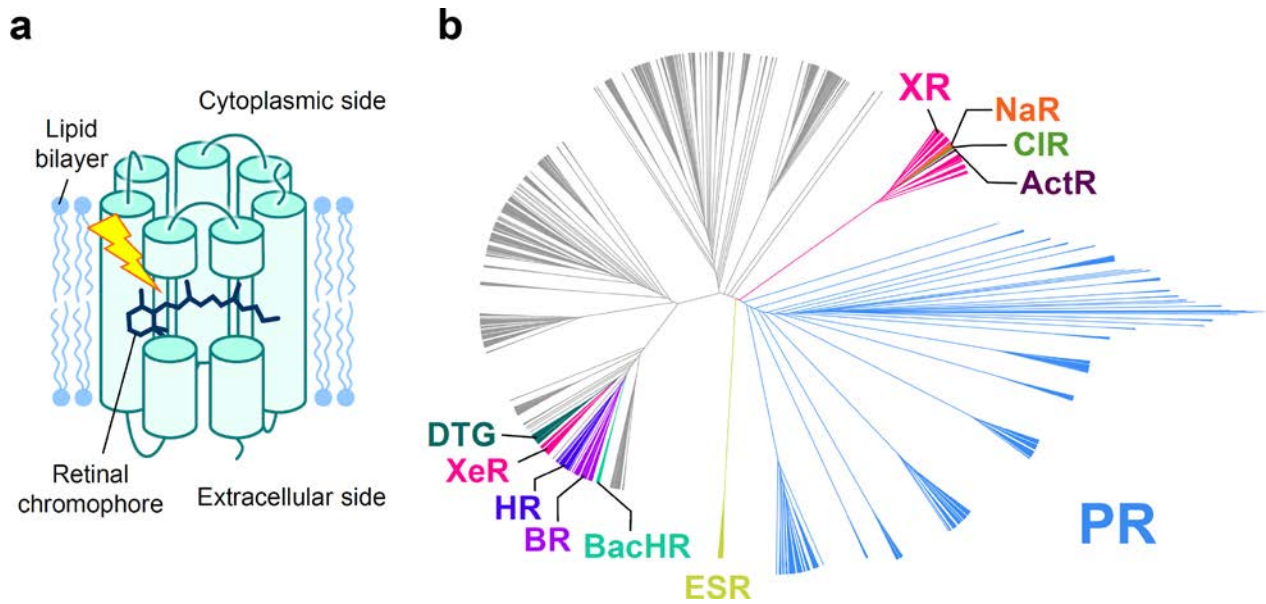

499

500

501 **Fig. 1. Structure and phylogenetic tree of microbial rhodopsins.**

502 **a** Schematic structure of microbial rhodopsins. **b** Phylogenetic tree of microbial rhodopsins. The

503 subfamilies of light-driven ion-pump rhodopsins targeted in this study are differently coloured;

504 non-ion-pump microbial rhodopsins are shown in grey.

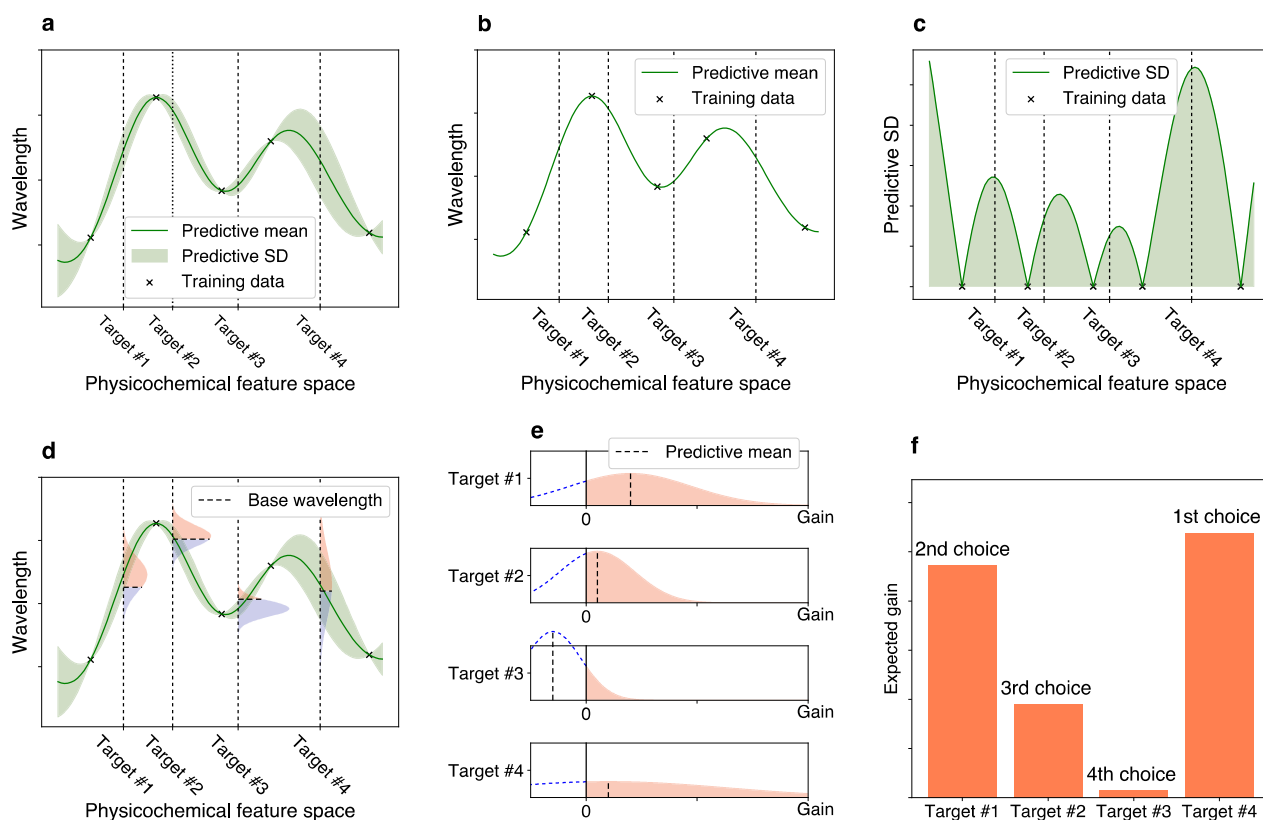

505  
506 **Fig. 2. Illustrations of exploration-exploitation for screening rhodopsins with red-shift**

507 **gain.**

508 **a** Bayesian prediction model constructed using the current training data (black crosses). The  
509 prediction model is represented by the predictive mean and predictive standard deviation (SD).  
510 The horizontal axis schematically illustrates the space of proteins defined through  
511 physicochemical features. The four vertical dotted lines indicate target proteins (candidates to  
512 synthesize). **b** Predictive mean. This function is defined as the expected value of the  
513 probabilistic prediction by the Bayesian model. **c** Predictive SD. Since the predictive SD  
514 represents the uncertainty of the prediction, it has a larger value when the training data points  
515 do not exist nearby. **d** The distributions on the vertical dotted lines represent the predictive  
516 distributions, and the horizontal dashed lines are the base wavelengths of the target points. The  
517 base wavelength is different for each target point because it depends on the subfamily of the  
518 protein. **e** The density of the predictive distribution of each target protein on its red-shift gain  
519 value. The gain is defined as the predicted wavelength subtracted by the base wavelength, and

520 if it is negative, the value is truncated as 0. This can be seen as a “benefit” that can be obtained  
521 by observing the target protein. **f** Expected value of the red-shift gain. This provides a ranking  
522 list from which the next candidates to be experimentally investigated can be determined. Target  
523 #4 has the largest expected gain, although target #1 has the largest increase in the predictive  
524 mean compared with base wavelength in **e**. Because of its larger SD (as shown in **a**, **c**, **d**, and  
525 **e**), target #4 is probabilistically expected to have a larger gain than the other targets.

526

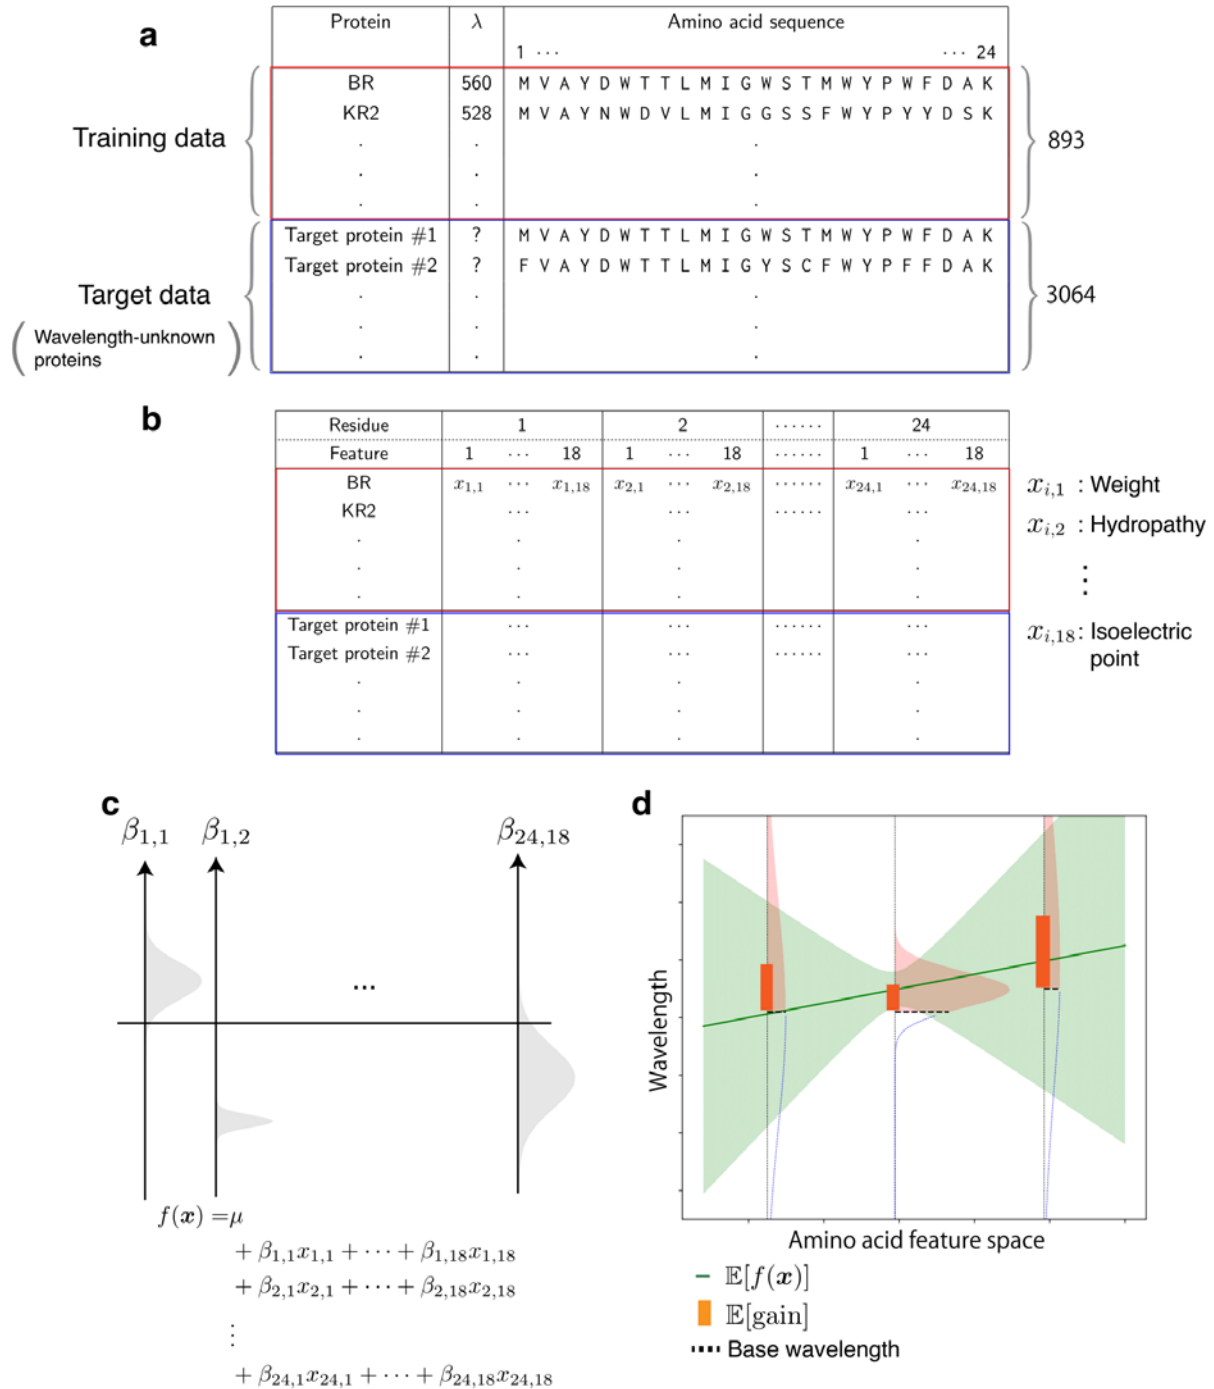

527

528 **Fig. 3. Overview of the ML-based exploration of natural red-shifted rhodopsins.**

529 **a** Using existing experimental data, a training data set consisting of pairs of a wavelength  $\lambda_{\max}$

530 and an amino acid sequence was constructed. A particular focus was placed on the 24 amino

531 acid residues around the retinal chromophore to build an ML-based prediction model. A set of

532 protein sequences with no known wavelength was also collected as target proteins. **b** All amino

533 acid sequences were transformed into physicochemical features, leading to  $24 \times 18 = 432$

534 dimensional numerical representations of each protein. **c** A linear regression model was  
535 constructed using the Bayesian approach. Each regression coefficient  $\beta_{i,j}$  was estimated as a  
536 distribution (shown as a gray region). The broadness of these distributions represent the  
537 uncertainty of the current estimation. **d** The expected red-shift gain values were evaluated for  
538 the target proteins. The green region is the standard deviation of the prediction. The red shaded  
539 region in the vertical distribution corresponds to the probability that the wavelength is larger  
540 than the base wavelength (dashed line), which is determined by the subfamily of the microbial  
541 rhodopsin. The bar represents the expected red-shift gain, defined by the expected value of the  
542 increase from the base wavelength.

543

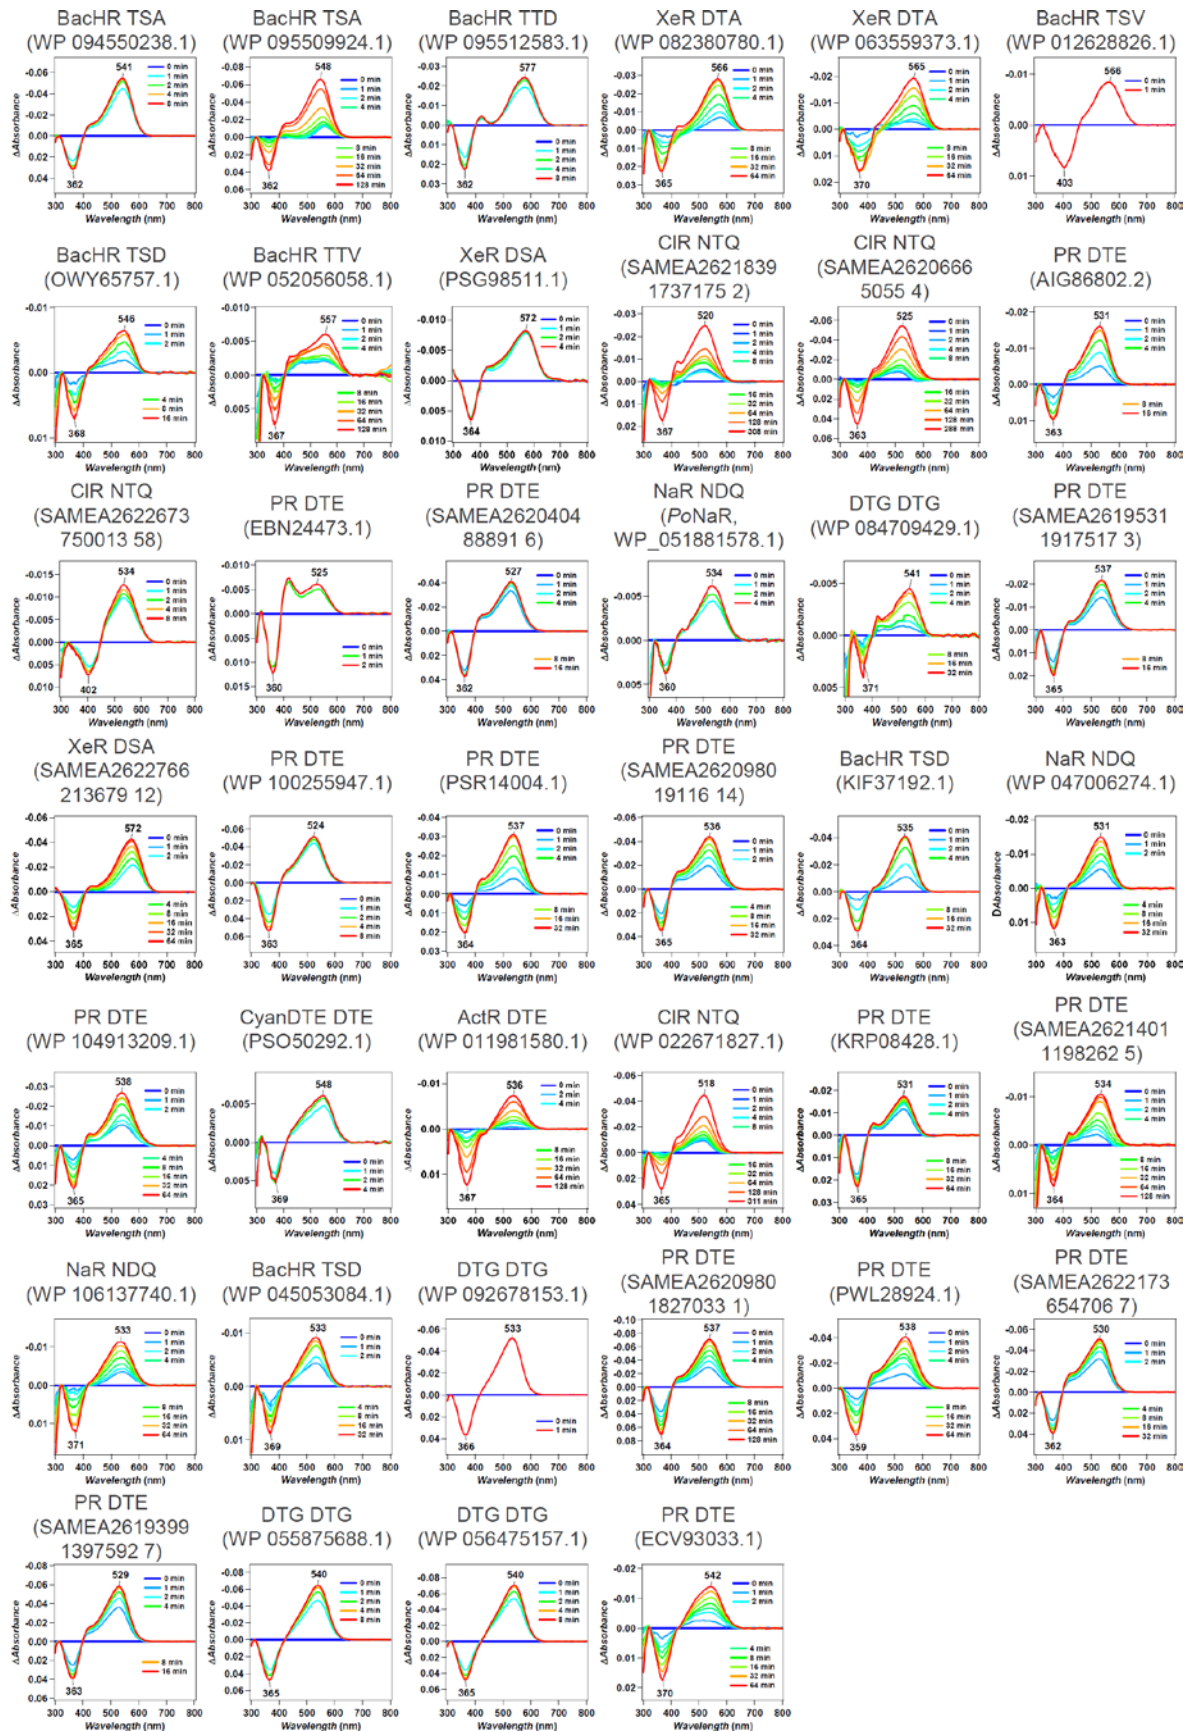

544  
545  
546

**Fig. 4.  $\lambda_{max}$  of 40 microbial rhodopsins in solubilized *E. coli* membrane observed upon**

547 **hydroxylamine bleach reaction.**

548 The difference absorption spectra between before and after hydroxylamine bleaching reaction  
549 of microbial rhodopsins in solubilized *E. coli* membrane. The  $\lambda_{\max}$  of each rhodopsin was  
550 determined by the peak positions of the absorption spectra of the original proteins, and the  
551 absorption of retinal oxime produced by the reaction of retinal Schiff base and hydroxylamine  
552 was observed as a negative peak at around 360–370 nm.

553

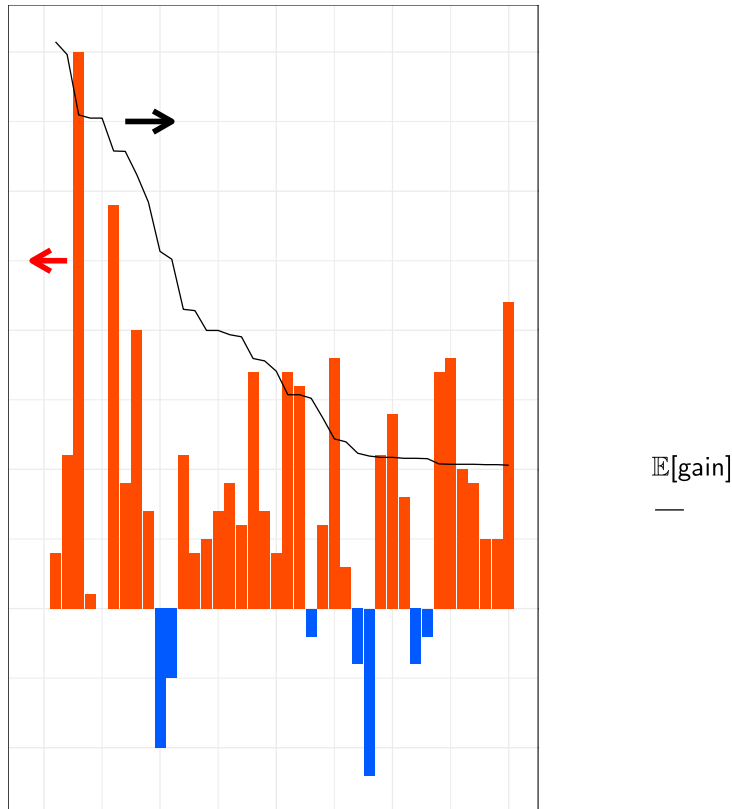

554

555 **Fig. 5. Observed wavelengths and expected red-shift gains.**

556 The predicted and observed red-shift (and blue-shift) gains for the 40 candidate rhodopsins that  
557 showed significant coloring in *E. coli* cells. Differences between observed and base  
558 wavelengths are shown by the bars. The red bars indicate red-shift from the base wavelength,  
559 while the blue bars indicate observed wavelengths that were shorter than the base wavelengths.

560 Proteins are sorted in the descending order by  $\mathbb{E}[\text{gain}]$ , as shown by the black line. Among the  
561 40 candidates, 33 (82.5%) showed red-shift gains, suggesting that the proposed ML-based  
562 model can screen red-shifted rhodopsins more efficiently than random choice.

563



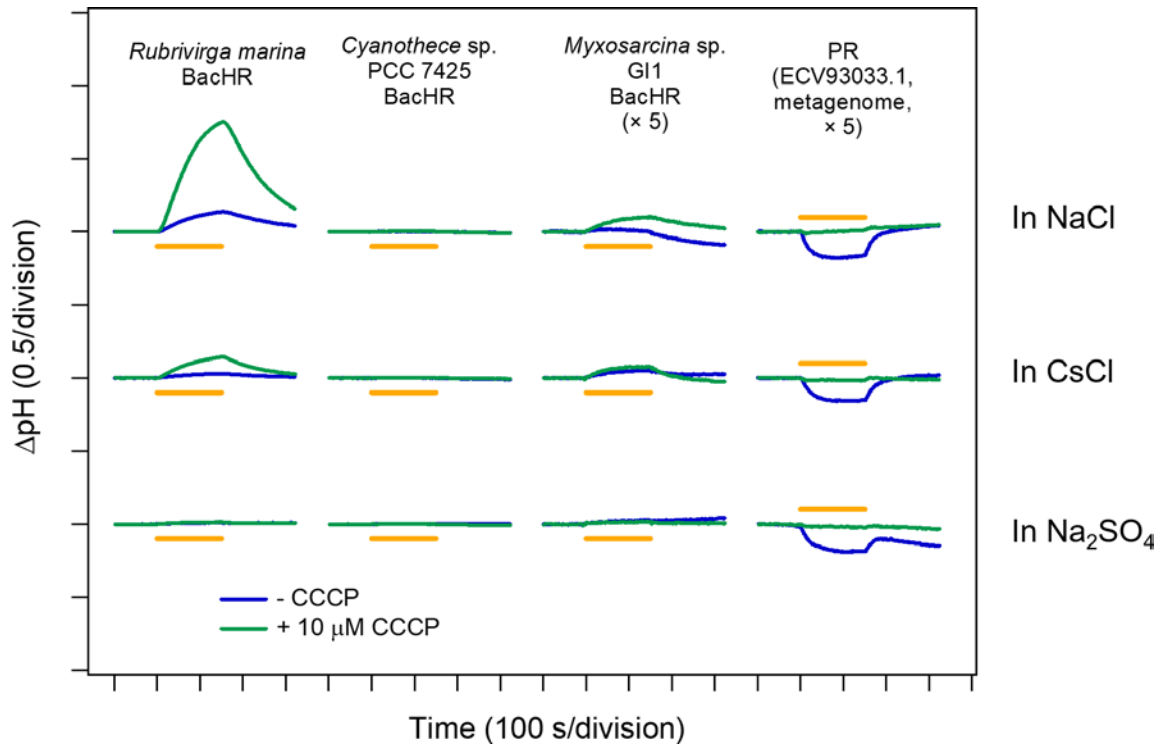

564

565 **Fig. 6. Light-driven ion-transport activities of microbial rhodopsins showed longer  $\lambda_{\text{max}}$ .**

566 The light-induced pH change in the external solvent of *E. coli* cells expressing four microbial

567 rhodopsins that showed a  $\lambda_{\text{max}} > 20$  nm longer than the base wavelength of the subfamily. The

568 data obtained without and with 10  $\mu\text{M}$  CCCP are indicated by the blue and green lines,

569 respectively, in 100 mM NaCl (top), CsCl (middle), and Na<sub>2</sub>SO<sub>4</sub> (bottom). Light was

570 illuminated for 150 s (yellow solid lines).

571

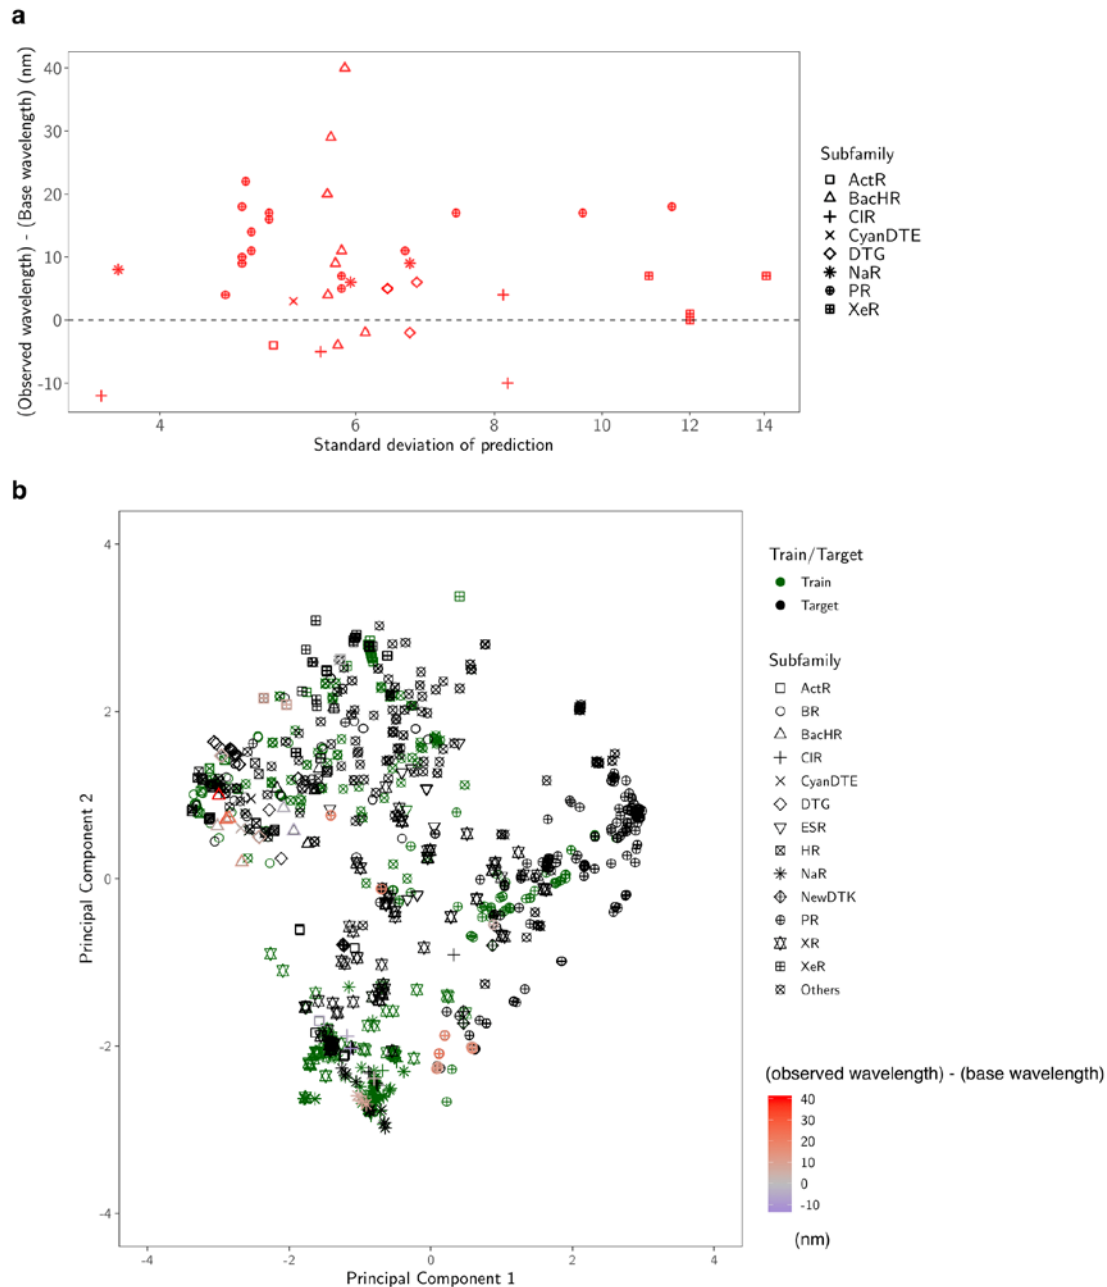

572  
573 **Fig. 7. Diversity of the selected proteins.**

574 **a** Predicted standard deviation (horizontal axis) vs. observed gain (vertical axis). The marker  
575 shape represents the subfamily of each protein. **b** Two-dimensional projection created by  
576 principal component analysis. The original  $d = 432$  dimensional feature space is projected  
577 onto the first two principal component directions. The first component (horizontal axis)  
578 explains 33% of the total variance of the original space, and the second (vertical axis) explains  
579 17%. The green markers are the training data, and the black markers are the target data. For the  
580 synthesized proteins, differences in the observed and base wavelengths are shown by the color

581 map. The results indicate that, by considering the exploration–exploitation trade-off, it was  
582 possible to make a red-shift protein screening process that considered not only the expected  
583 value of the prediction, but also the uncertainty.  
584

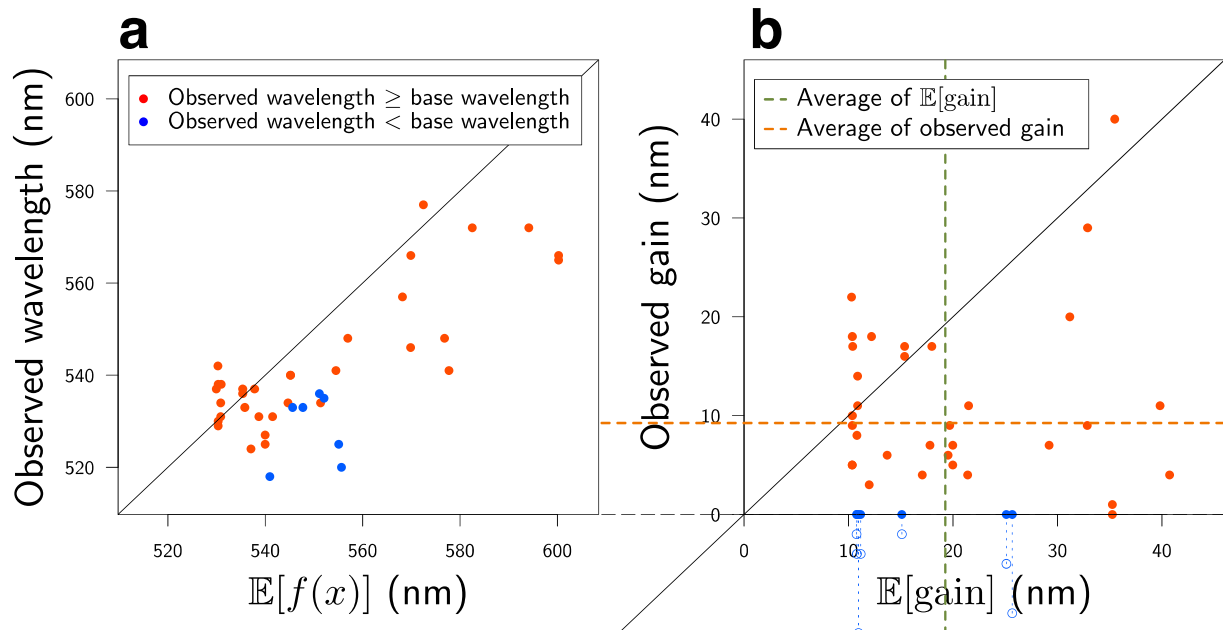

585

586 **Fig. 8. Comparisons of experimental observations and ML predictions.**

587 In these two plots, the red points have longer observed wavelengths than the base wavelength

588  $\lambda_{\text{base}}$ , while the blue points have shorter observed wavelengths than  $\lambda_{\text{base}}$ . **a** ML-based

589 prediction of  $\lambda_{\text{max}}$  (horizontal axis) vs. experimentally observed  $\lambda_{\text{max}}$  (vertical axis). **b**

590 Expected red-shift gain (horizontal axis) vs. observed gain (vertical axis). Since we selected

591 rhodopsins having expected red-shift gains of  $> 10$  nm, all the points on the horizontal axis are

592  $> 10$  nm. The observed gain, defined by  $\max(\lambda_{\text{max}} - \lambda_{\text{base}}, 0)$ , is nonnegative by definition.

593 The green and orange dashed lines are the averages of the horizontal and vertical axes (19.3

594 nm and 9.3 nm), respectively. The results indicate that the observed wavelengths and red-shift

595 gains tended to be smaller than the predicted ones. We conjecture that these differences between

596 the observed and predicted wavelengths are due to modelling errors (see the Discussion for

597 details).

598

599

**Supporting Information:**

600

**Exploration of natural red-shifted rhodopsins using a machine learning-**

601

**based Bayesian experimental design**

602

Inoue and Karasuyama et al.

603

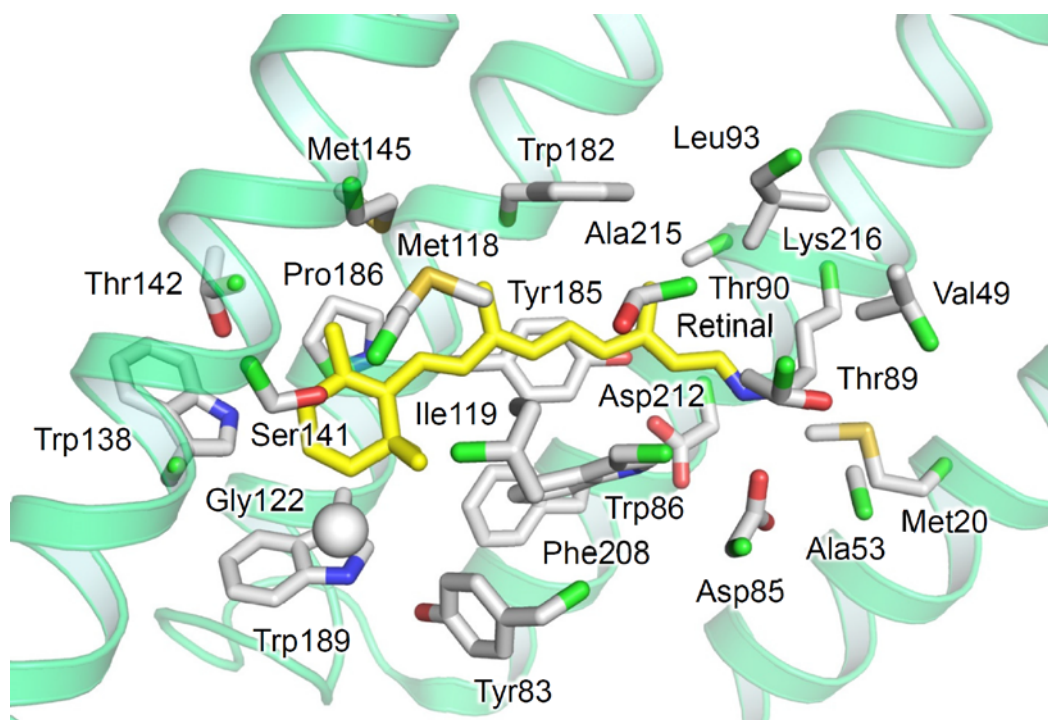

|               |        |        |        |        |        |        |        |        |
|---------------|--------|--------|--------|--------|--------|--------|--------|--------|
| <i>i</i>      | 1      | 2      | 3      | 4      | 5      | 6      | 7      | 8      |
| Residue in BR | Met20  | Val49  | Ala53  | Tyr83  | Asp85  | Trp86  | Thr89  | Thr90  |
| <i>i</i>      | 9      | 10     | 11     | 12     | 13     | 14     | 15     | 16     |
| Residue in BR | Leu93  | Met118 | Ile119 | Gly122 | Trp138 | Ser141 | Thr142 | Met145 |
| <i>i</i>      | 17     | 18     | 19     | 20     | 21     | 22     | 23     | 24     |
| Residue in BR | Trp182 | Tyr185 | Pro186 | Trp189 | Phe208 | Asp212 | Ala215 | Lys216 |

604

605

606 **Extended Data Figure 1. Amino acid residues around the retinal chromophore.**

607 The structure of the 24 amino acid residues around the retinal used in the current ML model in

608 the X-ray crystallographic structure of BR (PDB ID: 1IW6 (Matsui et al. *J. Mol. Biol.* (2002)

609 **324**, pp. 469–481)). The C $\alpha$  atom of Gly122 is shown as a white sphere. For clarity, the ribbon

610 models of helices B, C, and E were omitted. The table lists the residue numbers and names of

611 each residue in BR.

612

| Subfamily | Motif | Origin                                                   | E [gain] | (observed wavelength) –<br>(base wavelength) / nm | Residue at<br>BR Leu93 | Residue at<br>BR Pro186 | Residue at<br>BR A215 |
|-----------|-------|----------------------------------------------------------|----------|---------------------------------------------------|------------------------|-------------------------|-----------------------|
| BacHR     | TTD   | <i>Rubrivirga marina</i>                                 | 35.5     | 40                                                | L                      | P                       | A                     |
| BacHR     | TSV   | <i>Cyanothece</i> sp. PCC 7425                           | 32.9     | 29                                                | I                      | P                       | A                     |
| PR        | DTE   | Metagenome sequence                                      | 10.3     | 22                                                | M                      | P                       | N                     |
| BacHR     | TTV   | <i>Myxosarcina</i> sp. G11                               | 31.2     | 20                                                | L                      | P                       | A                     |
| PR        | DTE   | <i>Pontimonas salivibrio</i>                             | 12.2     | 18                                                | L                      | P                       | N                     |
| PR        | DTE   | <i>Fluviicola</i> sp. XM24bin1                           | 10.4     | 18                                                | M                      | P                       | N                     |
| PR        | DTE   | <i>Bacteroidetes</i> bacterium                           | 15.4     | 17                                                | M                      | P                       | N                     |
| PR        | DTE   | Metagenome sequence                                      | 18.0     | 17                                                | L                      | P                       | N                     |
| PR        | DTE   | Metagenome sequence                                      | 10.4     | 17                                                | M                      | P                       | N                     |
| PR        | DTE   | Metagenome sequence                                      | 15.4     | 16                                                | M                      | P                       | N                     |
| PR        | DTE   | Metagenome sequence                                      | 10.9     | 14                                                | M                      | P                       | N                     |
| PR        | DTE   | <i>Sphingobacteriales</i> bacterium BACL12 MAG120802bin5 | 10.9     | 11                                                | M                      | P                       | N                     |
| PR        | DTE   | <i>Nonlabens</i> sp. YIK11                               | 21.5     | 11                                                | M                      | P                       | N                     |
| BacHR     | TSA   | <i>Rubrivirga marina</i>                                 | 39.8     | 11                                                | L                      | P                       | A                     |
| PR        | DTE   | Metagenome sequence                                      | 10.4     | 10                                                | M                      | P                       | N                     |
| NaR       | NDQ   | <i>Parvularcula oceani</i>                               | 19.7     | 9                                                 | L                      | T                       | S                     |
| BacHR     | TSD   | <i>Cyanobacterium</i> TDX16                              | 32.9     | 9                                                 | L                      | P                       | A                     |
| PR        | DTE   | Metagenome sequence                                      | 10.4     | 9                                                 | M                      | P                       | N                     |
| NaR       | NDQ   | <i>Spirosoma oryzae</i>                                  | 10.8     | 8                                                 | L                      | P                       | S                     |
| XeR       | DSA   | <i>Nanohaloarchaea</i> archaeon SW 7 43 1                | 29.2     | 7                                                 | I                      | P                       | C                     |
| XeR       | DSA   | Metagenome sequence                                      | 17.8     | 7                                                 | I                      | P                       | C                     |
| PR        | DTE   | Metagenome sequence                                      | 20.0     | 7                                                 | M                      | P                       | N                     |
| DTG       | DTG   | <i>Rubrobacter aplysinae</i>                             | 19.5     | 6                                                 | L                      | P                       | A                     |
| NaR       | NDQ   | <i>Erythrobacter gangjinensis</i>                        | 13.7     | 6                                                 | L                      | P                       | S                     |
| DTG       | DTG   | <i>Sphingomonas</i> sp. Leaf34                           | 10.3     | 5                                                 | L                      | P                       | A                     |
| DTG       | DTG   | <i>Sphingomonas</i> sp. Leaf38                           | 10.3     | 5                                                 | L                      | P                       | A                     |
| PR        | DTE   | Metagenome sequence                                      | 20.0     | 5                                                 | M                      | P                       | N                     |
| PR        | DTE   | <i>Reinekea forsetii</i>                                 | 17.1     | 4                                                 | L                      | P                       | N                     |
| BacHR     | TSA   | <i>Rubricoccus marinus</i>                               | 40.7     | 4                                                 | L                      | P                       | A                     |
| CIR       | NTQ   | Metagenome sequence                                      | 21.4     | 4                                                 | L                      | P                       | S                     |
| CyanDTE   | DTD   | <i>Cyanobacteria</i> bacterium QH 1 48 107               | 12.0     | 3                                                 | L                      | P                       | A                     |
| XeR       | DTA   | <i>Bacillus</i> sp. CHD6a                                | 35.3     | 1                                                 | L                      | P                       | S                     |
| XeR       | DTA   | <i>Bacillus horikoshii</i>                               | 35.3     | 0                                                 | L                      | P                       | S                     |
| DTG       | DTG   | <i>Rosenbergiella nectarea</i>                           | 10.8     | -2                                                | L                      | P                       | A                     |
| BacHR     | TSD   | <i>Hassallia byssoidea</i> VB512170                      | 15.1     | -2                                                | L                      | P                       | S                     |
| ActR      | DTE   | <i>Kineococcus radiotolerans</i>                         | 11.2     | -4                                                | L                      | P                       | A                     |
| BacHR     | TSD   | <i>Aliterella atlantica</i>                              | 10.8     | -4                                                | L                      | P                       | S                     |
| CIR       | NTQ   | Metagenome sequence                                      | 25.1     | -5                                                | L                      | P                       | T                     |
| CIR       | NTQ   | Metagenome sequence                                      | 25.7     | -10                                               | L                      | P                       | T                     |
| CIR       | NTQ   | <i>Sphingopyxis baekryungensis</i>                       | 11.0     | -12                                               | L                      | P                       | T                     |

613

614 **Extended Data Figure 2. Amino acid residues at the color-tuning positions.**

615 The amino acid residues at the color-tuning positions corresponding to BR Leu93, Pro189, and

616 Ala215.
